# Supplementary material for: VCAM‐1 upregulation accompanies muscle remodeling following resistance‐type exercise in Snell dwarf (Pit1dw/dw) mice
Source: PubMed Central journal article supplement (PMC6156491; doi:10.1111/acel.12816), 2018-07-10
Supplement: ACEL-17-e12816-s004.pdf [file ACEL-17-e12816-s004.pdf]

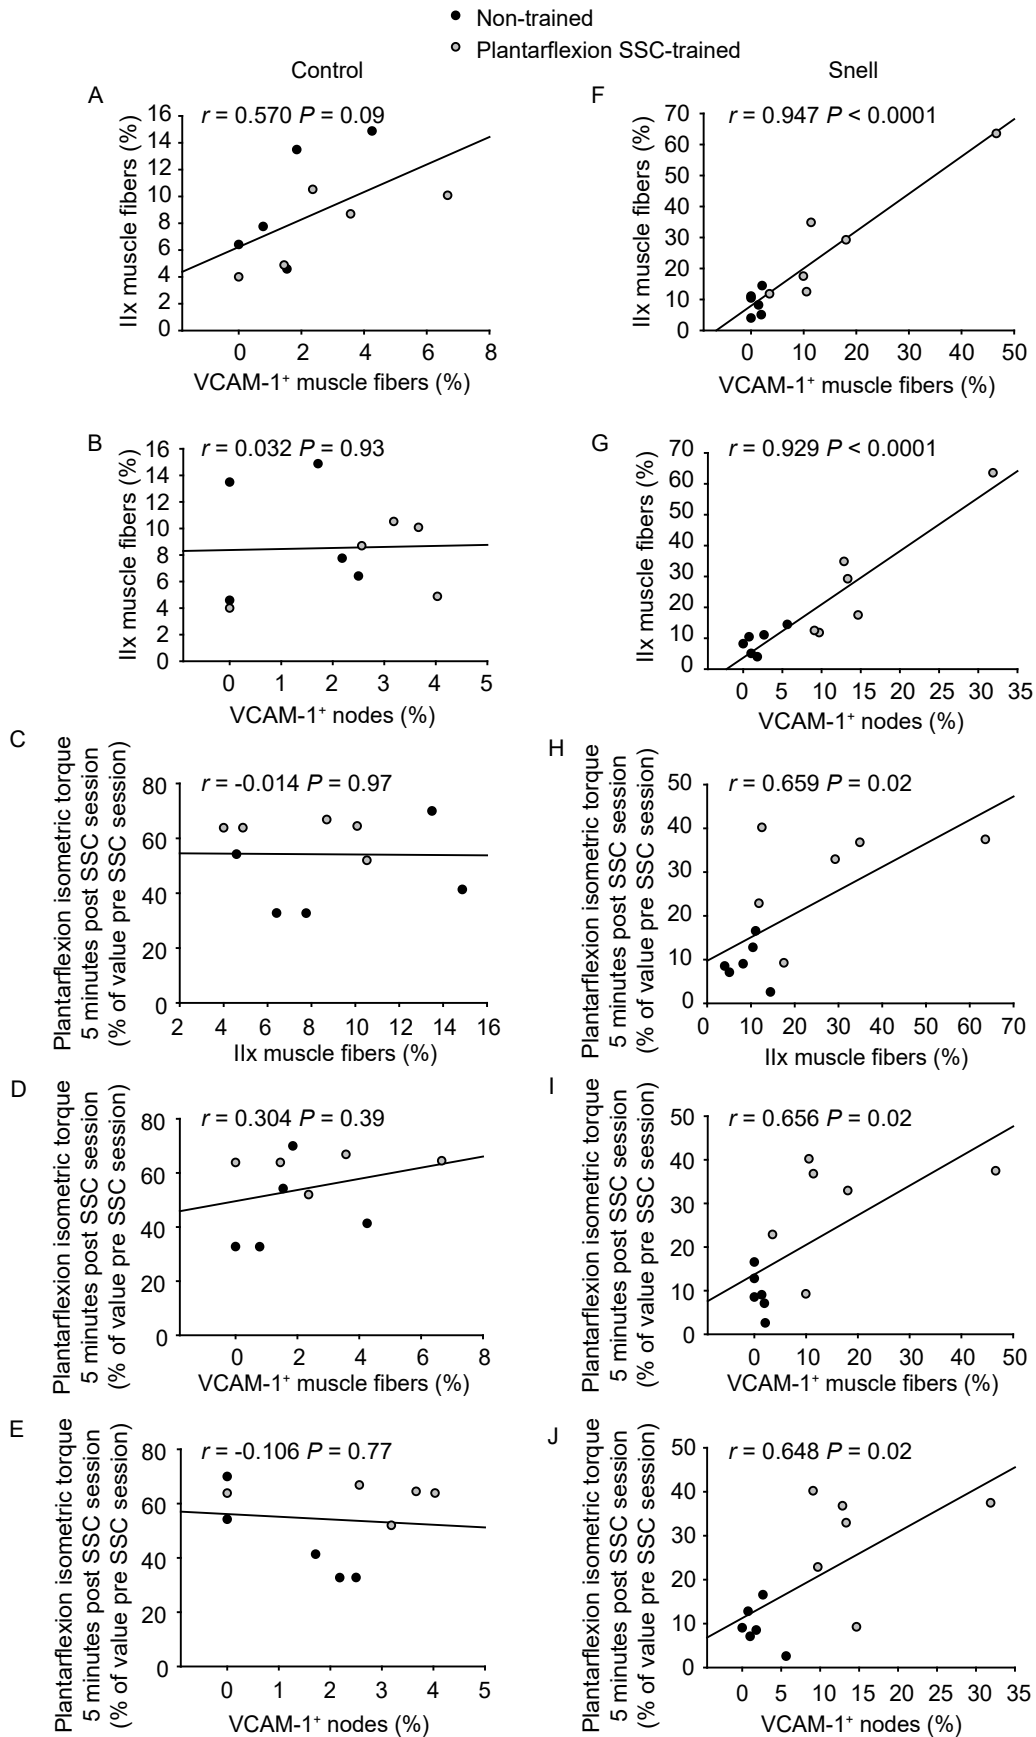

**Fig. S4. A robust and coordinated remodeling response in VCAM-1 and type IIx fiber distribution unique to SSC-trained Snell dwarf mice was correlated with improved recovery from fatigue.** Correlations between VCAM-1<sup>+</sup> staining, type IIx fibers, and post-SSC isometric torque (a measure of fatigue recovery) were determined for (A-E) control mice and (F-J) Snell dwarf mice. Correlation coefficients and P values were determined by Pearson product correlation analysis. Sample sizes were N = 5 to 6 per group.
